# Supplementary material
Source: HighWire-hosted journal article supplement (https://jnm.snmjournals.org/highwire/filestream/94003/field_highwire_adjunct_files/0/62216_Supplemental_Figure_1.pdf)

## Supplemental Figure 1

**Schematic illustration of the experimental protocol.** Sixteen Wistar rats were divided in two groups (n=8 in each group). The exercise group (E) performed electrically stimulated muscle contractions of one hindlimb for 30 minutes with the contralateral leg serving as a control leg. The exercise-cuff group (EC) performed similar muscle contractions but additionally had a tight cuff around the contracted leg from the cessation of the muscle contractions until the end of the early PET scan. In both groups the tracer  $^{64}\text{Cu}$ ATSM was injected after 10 minutes of muscle contractions. An early (0 to 30 minutes post-contractions) and a late PET scan (60 to 90 minutes post contractions) were performed with a CT scan for anatomical information.

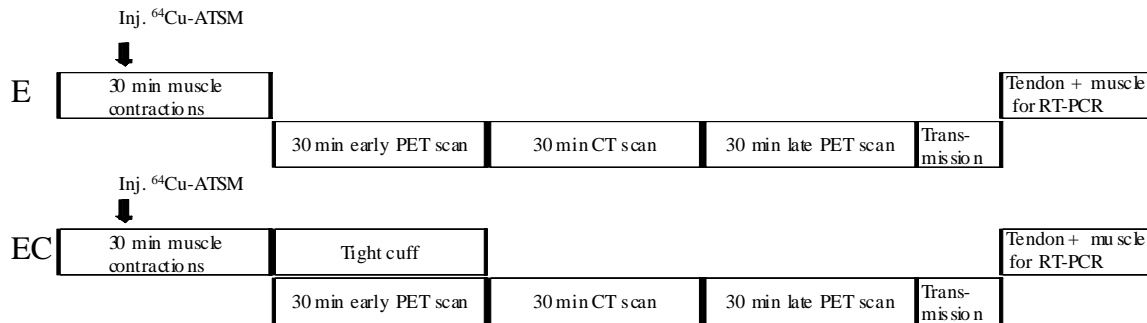

Supplement: 62216_Supplemental_Figure_1.pdf [file 62216_Supplemental_Figure_1.pdf]
